# Supplementary material
Source: publisher figshare collection journal article supplement (https://frontiersin.figshare.com/ndownloader/files/31240075)
Supplement: Supplementary file [file 31240075]

## Suppl. Figure 1

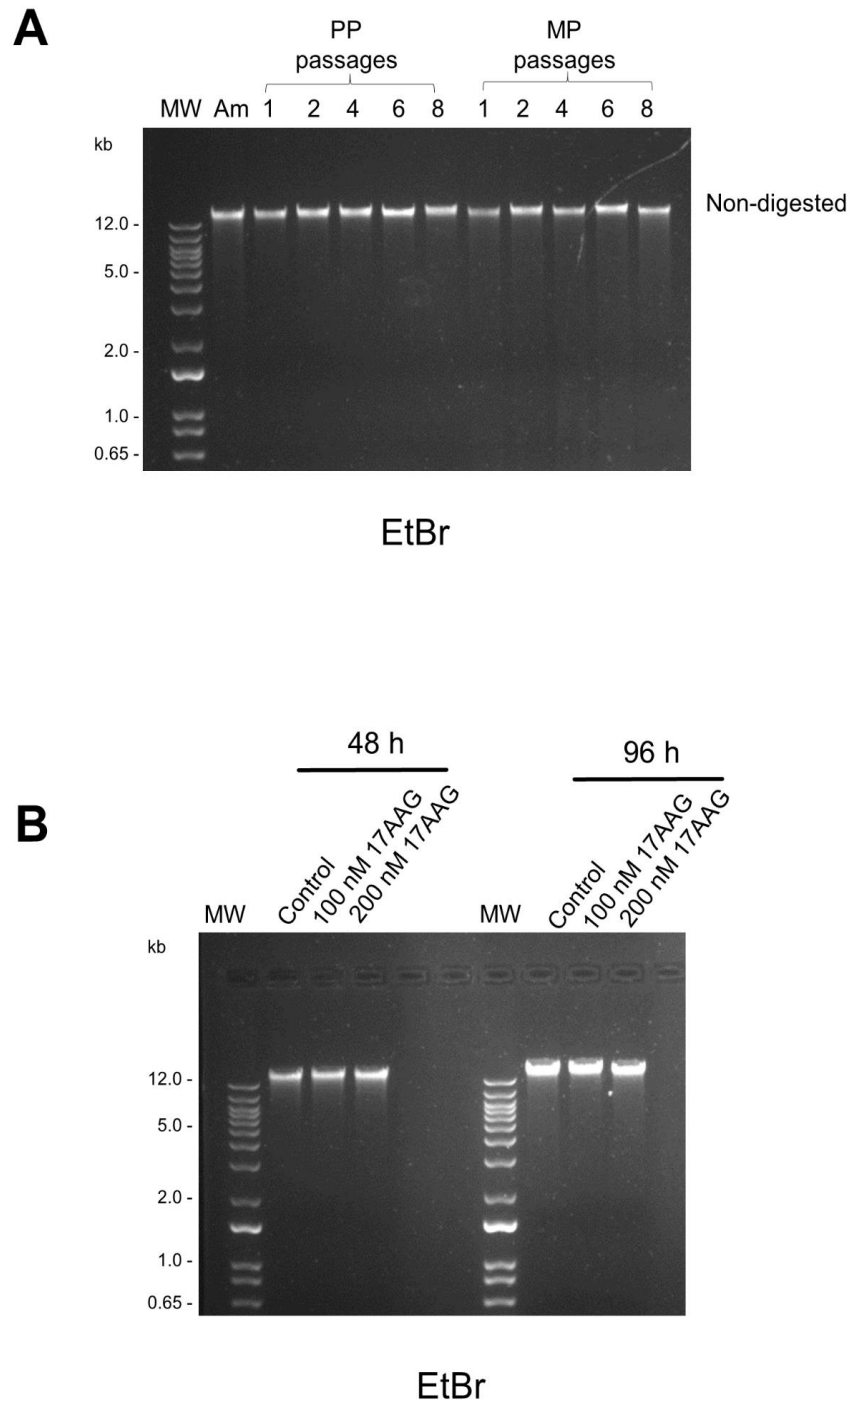

**Suppl. Figure 1. The integrity of DNA samples used in the TRF analysis.** A) Genomic DNA obtained from all three parasite life forms (A, amastigotes, PP procyclic promastigotes, MP, metacyclic promastigotes); PP and MP passages 1, 2, 4, 6, and 8. B) Genomic DNA obtained from PP non-treated (control) and treated with 17AAG for 48 h and 96 h. The integrity of each non-digested DNA sample shown in A) and B) was confirmed by fractionation in 0.8% ethidium bromide (EtBr)-stained agarose gels. MW, 1kb plus DNA ladder (Invitrogen).

## Suppl. Figure 2

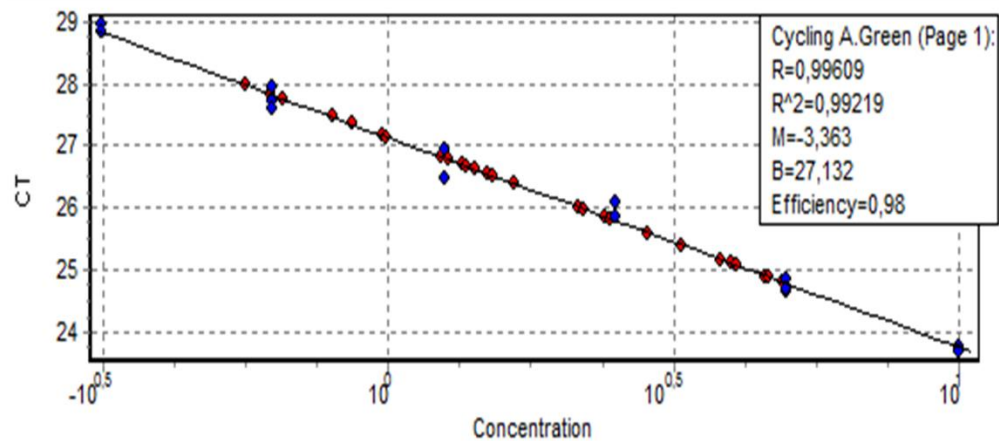

**Suppl. Figure 2. qPCR telomere assay demonstrates that *L. amazonensis* promastigotes have longer telomeres compared to amastigotes.** The telomere assay was performed on the Rotor-Gene® Q real-time instrument with the QIAGEN Rotor-Gene SYBR Green Kit. For the standard curve, gDNA from *Leishmania* promastigotes was diluted at 1:2 in six serial dilutions in the range of 10 ng-0.3125 ng/PCR in a 24 µl reaction volume. The PCR assay was repeated for 25 cycles. The assay was set up using a QIAgility® liquid handling instrument.

### Suppl. Figure 3

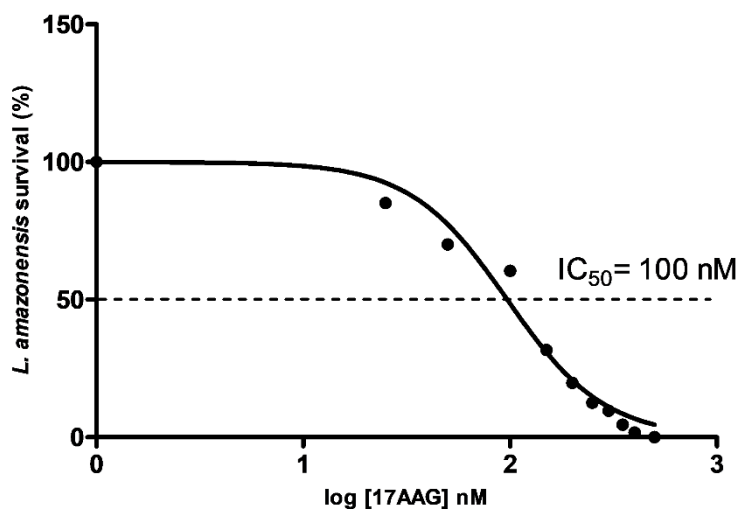

**Suppl. Figure 3. The  $IC_{50}$  value of 17AAG for *L. amazonensis* PP.** The  $IC_{50}$  value was determined from a dose-response inhibition fit using GraphPad Prism 8.0. Each value in the curve is the average of assays carried out in triplicates.

## Suppl. Figure 4

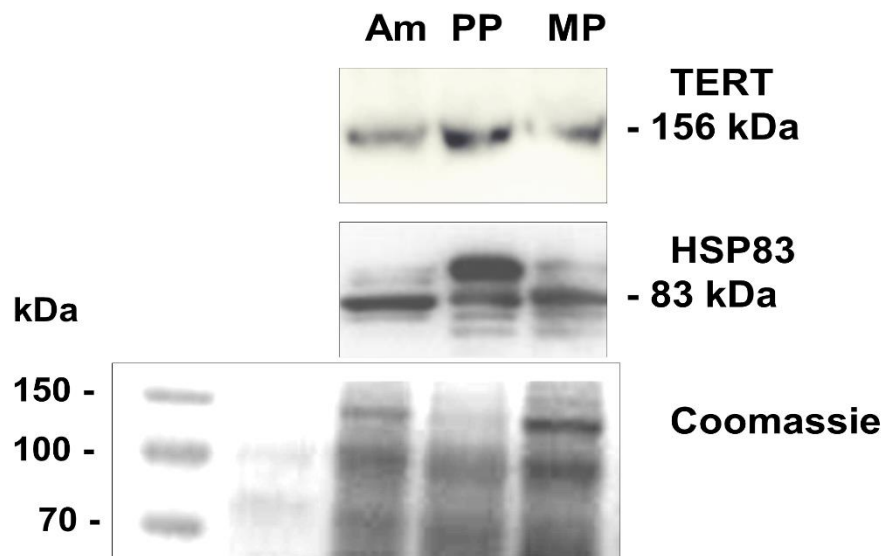

**Suppl. Figure 4. Western blot analysis shows TERT and HSP83 in telomerase-positive extracts of the three parasite life forms.** Approximately 300  $\mu$ g of telomerase-positive extracts obtained from amastigotes (A), promastigotes (P), and metacyclics (M) were fractionated in 10% SDS-PAGE gels and transferred to nitrocellulose membranes (BioRad). Western blots were revealed with anti-LaTERT and anti-LdHSP83 polyclonal sera and developed using a goat anti-rabbit HRP-conjugated secondary antibody (Bio-Rad) and the enhanced chemiluminescence (ECL), according to the manufacturer's instructions (GE). Protein extracts fractionated in a Coomassie-stained 10% SDS-PAGE gel were used as the loading control.
